# Supplementary material
Source: Elsevier journal article supplement (https://www.sciencedirect.com/science/article/pii/S003474501730094X)
Supplement: mmc3 [file S003474501730094X:mmc3.doc]

ANEXO C. Evaluación de calidad de la evidencia - GRADE DESENLACE CONOCIMIENTO
Autor(es): Garzón N
Fecha: 2016-04-27
Pregunta: Medio Audiovisual vs Otros formatos para evaluar el cambio del Conocimiento
Bibliografía: Gattellari 2005

			
Evaluación Calidad			
No de pacien	
tes		
Efecto	


Calidad	


Importancia	
No de estudios	Diseño del Estudio	Riesgo de sesgo	
Inconsistencia	Evidencia indirecta	
Imprecisión	Otras consideraciones	
Audiovisual	Otros formatos	Relativo (95% IC)	
Absoluto			
Conocimiento (Seguimiento: mediana de 21 días1; evaluado con: Media de porcentaje de ítems correctos)	
1	Ensayo aleatorizado	No es serio Riesgo de sesgo	Serio2	Serio3	No es serio Imprecisión	Ninguno	1414	1405	-	Media 45.8 Más
(42.7 a 48.8
Más)6	
BAJA	CRITICO	
IQR (Rango intercuatílico); IC (Intervalo de Confianza)
1 (IQR 15–31)
2 Debido a la heterogeneidad de los resultados en los IC
3 Debido a que los resultados de pre y post test no estas analizados entre los grupos, y al realizarlo por los autores de esta revisión los datos no estuvieron disponibles
4 Video
5 LEAFLET
6 Son los datos de la medida de conocimiento del grupo intervención de la medición post.

Autor(es): Garzón N
Fecha: 2016-05-03
Pregunta: Formato de Video (DVD) vs Material escrito para evaluar el cambio del Conocimiento
Bibliografía: Arterburn2011 Paradis 2011

			
Evaluación Calidad			
No de pacientes		
Efecto	

Calidad	

Importancia	
No de	Diseño del	Riesgo de	Inconsistencia	Evidencia	Imprecisión	Otras	Video	Material	Relativo
(95%	Absoluto			


estudios	Estudio	sesgo		indirecta		consideraciones	(DVD)	escrito	IC)				
Conocimiento (evaluado con: Media de ítems de respuestas correctas)	
2	Ensayo aleatorizado	Serio1	Serio2	No es serio Evidencia indirecta	Serio3	Ninguno	145	144	-	DME 0.34 Menos
(0.57 a 0.11 Menos)4	 MUY BAJA	CRITICO	
IC (Intervalo de confianza); DME (Diferencia de medias estandarizadas)

1 En los dos artículos presentan no claro el cegamiento y el ocultamiento
2 Los estudios presentan heterogeneidad ya que evalúan conocimiento, pero la población es diferente, en uno de ellos son pacientes y familiares que asistieron a la primera consulta después del nacimiento. Y el otro estudio son pacientes de 20 a 65 años con candidatos a cirugía bariátrica
3 La diferencia de medias estandarizadas calculada por los autores de la revisión muestra -0.34 (IC -0.57.-0.11)
4 Calculada por los autores de la revisión

Autor(es): Garzón N
Fecha: 2016-05-03
Pregunta: Formato Video vs Asesoría Verbal o estandar para evaluar el cambio del Conocimiento
Bibliografía: Calderon 2011 Dunn 1998 Hutchison 2011 Mulrow 1987 Rossi 2004 Shrer 2001 Wilhelm 2009

			
Evaluación Cali	
dad			
No de pacie	
ntes		
Efecto	


Calidad	


Importancia	
No de estudios	Diseño del Estudio	Riesgo de sesgo	
Inconsistencia	Evidencia indirecta	
Imprecisión	Otras consideraciones	
Video	Asesoría Verbal o estándar	Relativo (95% IC)	
Absoluto			
Conocimiento (Calderon 2011 Dunn1998) (evaluado con: Media de puntaje de conocimiento)	
2	Ensayo aleatorizado	Serio	Muy Serio1	No es serio Evidencia indirecta	No es serio Imprecisión	Ninguno	243	244	-	DME 0.75 Más
(0.56 a 0.93
Más)2	 MUY BAJA	CRITICO	
Conocimiento (Hutchison 2007) (Seguimiento: 1 semanas; evaluado con: Diferencia de media del puntaje de cambio de conocimiento; Rango del puntaje: 0-12)	
1	Ensayo aleatorizado	Muy Serio3	No es serio Inconsistencia	No es serio Evidencia indirecta	Serio4	Ninguno	86	87	-	DM 5 Más (0 a
16 Más)5	 MUY BAJA	CRITICO	
Conocimiento (Mulrow 1987) (Seguimiento: 7-11 meses; evaluado con: Media de puntaje de conocimiento)	


1	Ensayo aleatorizado	Muy Serio6	No es serio Inconsistencia	No es serio Evidencia indirecta	Muy Serio7	Ninguno	40	40	-	Media 0 Más (0
a 0 Más)8	 MUY BAJA	CRITICO	
Conocimiento (Rossi 2004) (Seguimiento: 1 semanas; evaluado con: Retención del conocimiento)	
1	Ensayo aleatorizado	Muy Serio6	No es serio Inconsistencia	No es serio Evidencia indirecta	Muy Serio7	Ninguno	23	25	-		 MUY BAJA	CRITICO	
Conocimiento (Shrier 2001) (Seguimiento: 1-12 meses; evaluado con: Puntaje de conocimiento del riesgo de enfermedades de transmisión sexual)	
1	Ensayo aleatorizado	Muy Serio6	No es serio Inconsistencia	No es serio Evidencia indirecta	Muy Serio7	Ninguno	60	63	-	9	 MUY BAJA	CRITICO	
Conocimiento (Wilhelm 2009) (evaluado con: Recordación de consentimiento informado)	
1	Ensayo aleatorizado	Muy Serio6	No es serio Inconsistencia	No es serio Evidencia indirecta	Muy Serio7	Ninguno	114	98	-	Media 4.62 Más
(0 a 0 Más)10	 MUY BAJA	CRITICO	
IC (Intervalo de Confianza); DME (Diferencia de medias estandarizadas); DM (Diferencia de medias)

1 los estudios presentan alta heterogeneidad debido a la población de estudio uno son padres de niños de 2 - 3 meses quienes cumplieron el esquema de vacunación y el otro grupo son adolescentes. Además, que el puntaje de conocimiento son diferentes.
2 Esta diferencia de medias estandarizadas fue calculada por los autores de la revisión en Review Manager, con los datos proporcionados de cada estudio.
3 No presenta ocultamiento ni cegamiento de la intervención, y no es claro la notificación de todos los resultados
4 EL intervalo de confianza para el resultado de conocimiento es muy alto
5 Dato que reporta el estudio. No es reportado por grupo sino solo la diferencia de mediaa de cambio de conocimiento.
6 No es claro la secuencia aleatoria, no el ocultamiento, ni el cegamiento, además presenta alto riesgo en el manejo de datos incompletos
7 No presenta estimadores de precisión.
8 No se observa un efecto de combinación entre el grupo de intervención ni el control. Ni los valores para el cálculo
9 No es reportado, no es posible calcularlo con los datos del estudio. solo reporta el valor p<0.05
10 Es la media de la muestra total, no reportan el IC, solo p=0.834

Autor(es): Garzón N
Fecha: 2016-05-07
Pregunta: Formato Video + Asesoría verbal vs Folleto + Asesoría Verbal para evaluar el Conocimiento
Bibliografía: Szmeja 2014 Snyder-Ramos 2005

Evaluación Calidad	No de pacientes	Efecto	Calidad	Importancia	


													
No de estudios	Diseño del Estudio	Riesgo
de sesgo	
Inconsistencia	Evidencia indirecta	
Imprecisión	Otras consideraciones	Video +
Asesoría verbal	Folleto +
Asesoría Verbal	Relativo (95% IC)	
Absoluto			
Conocimiento (Szmeja 2014) (Seguimiento: 28-36 semanas; evaluado con: Conocimiento de alimentos saludables en embarazadas)	
1	Ensayo aleatorizado	Serio1	No es serio Inconsistencia	No es serio Evidencia indirecta	No es serio Imprecisión	Ninguno	201/285 (70.5%)	203/301 (67.4%)	Riesgo relativo ajustado (RRA) 1.06
(0.95 a 1.18)2	40 más por
1000 (de 34
menos a 121 más)	
MODERADO	CRITICO	
								0%		-			
Conocimiento (Szmeja 2014a) (Seguimiento: 28-36 semanas; evaluado con: Conocimiento sobre el ejercicio en embarazadas)	
1	Ensayo aleatorizado	Serio1	No es serio Inconsistencia	No es serio Evidencia indirecta	No es serio Imprecisión	Ninguno	204/285 (71.6%)	220/301 (73.1%)	Riesgo relativo ajustado (RRA) 1.05
(0.95 a 1.16)3	37 más por
1000 (de 37
menos a 117 más)	
MODERADO	CRITICO	
								0%		-			
Conocimiento (Snyder-Ramos 2005) (evaluado con: Media de puntaje de ganancia de información)	
1	Ensayo aleatorizado	Serio4	No es serio Inconsistencia	No es serio Evidencia indirecta	Muy Serio5	Ninguno	94	83	-	DM 0.8 Más
(0.5 a 1.1
Más)6	
MUY BAJA	CRITICO	
IC (Intervalo de Confianza); DM (Diferencias de Medias)

1 No es claro el cegamiento de los participantes, investigadores y evaluadores
2 Valor p=0.3
3 Valor p=0.28
4 No presenta cegamiento y el ocultamiento de la intervención no es clara
5 No presenta medida de IC sino de rango de la media
6 Dato calculado por los autores de la Revisión en Review Manager

Autor(es): Garzón N
Fecha: 2016-05-08
Pregunta: Formato Video + Folleto o información escrita vs Folleto o información escrita
Bibliografía: Eaden 2002 Weston 1997 Holzheimer 1998


			
Evaluación Calida	
d			
No de pacientes		
Efecto	


Calidad	


Importancia	
No de estudios	Diseño del Estudio	Riesgo de sesgo	
Inconsistencia	Evidencia indirecta	
Imprecisión	Otras consideraciones	Video + Folleto o información escrita	Folleto o información escrita	Relativo (95% IC)	
Absoluto			
Conocimiento (Eaden 2002) (Seguimiento: 1 meses; evaluado con: Media de puntaje de conocimiento de colonoscopia y riesgo de cáncer; Rango del puntaje: 1-12)	
1	Ensayo aleatorizado	Serio1	No es serio Inconsistencia	No es serio Evidencia indirecta	Serio2	Ninguno	56		59	-	DM 0.6 Más
(0.19 Menos a
1.39 Más)	
BAJA	CRITICO	
Conocimiento (Eaden 2002a) (Seguimiento: 1 meses; evaluado con: Diferencia de Media del porcentaje de cambio de puntaje de conocimiento de colonoscopia y riesgo de cancer; Rango del puntaje: 1-12)	
1	Ensayo aleatorizado	Serio1	No es serio Inconsistencia	No es serio Evidencia indirecta	Serio2	Ninguno	56		59	-	DM 18.3 Más
(6.33 Menos a
42.93 Más)	
BAJA	CRITICO	
Conocimiento (Weston 1997)3 (Seguimiento: 2-4 semanas; assessed with: Porcentaje de conocimiento del protocolo de estudio y la ruptura prematura plazo de las membranas plazo)	
1	Ensayo aleatorizado	Serio4	No es serio Inconsistencia	No es serio Evidencia indirecta	Serio5	Ninguno	36/41 (87.8%)	28/44 (63.6%)	RR 1.38
(1.07 a
1.77)6	242 más por
1000 (de 45
más to 490 más)	
BAJA	CRITICO	
Conocimiento (Holzheimer 1998)7 (Seguimiento: 1-3 semanas; evaluado con: Media de conocimiento del asma)	
1	Ensayo aleatorizado	Muy Serio8	No es serio Inconsistencia	Serio9	Serio5	Ninguno	010		-	-	MD 0 Más (0 a
0 Más)11	 MUY BAJA	CRITICO	
IC (Intervalo de Confianza); DM (Diferencias de Medias)

1 No es claro si se realizó aleatorización, ni ocultamiento, ni cegamiento 2 Al realizar el cálculo de las diferencias de medias el IC es muy amplio 3 Datos del Seguimiento: 2-4 semanas
4 No es claro el ocultamiento y no presenta cegamiento
5 No presenta medidas de precisión
6 Fue calculado por los autores de la revisión con Review Manager
7 Se escogieron del grupo 1 (video + folleto relacionados al asma) y el grupo 3 ( Video no relacionado + Folleto relacionado al asma)


8 No es claro secuencia aleatoria, ocultamiento, no presenta cegamiento y no reporta todos los resultados
9 No reporta todos los resultados y esto podría modificar los resultados
10 No reporta la cantidad de participantes en cada grupo, solo el total n=80
11 No fue posible calcularlo por la falta de información

Autor(es): Garzón N
Fecha: 2016-05-08
Pregunta: Formato Multimedia vs Programas Usuales
Bibliografía: Linné 2006 Klein 2011 Di noia 2004


Evaluación Calidad	
No de pacientes	
Efecto	


Calidad	


Importancia	
No de estudios	Diseño del Estudio	Riesgo de sesgo	
Inconsistencia	Evidencia indirecta	
Imprecisión	Otras consideraciones	
Multimedia	Programas Usuales	Relativo
(95% IC)	
Absoluto			
Conocimiento (Linné 2006) (Seguimiento: 6 meses; evaluado con: Media de puntaje de Conocimiento general de insuficiencia cardiaca y su tratamiento; Rango del
puntaje: 1-16)	
1	Ensayo aleatorizado	Muy Serio1	No es serio Inconsistencia	Muy Serio2	Muy Serio3	Ninguno	434	394	-	Media 105	 MUY BAJA	CRITICO	
Conocimiento (Klein 2011) (Seguimiento: 3 meses; evaluado con: Media de puntaje de conocimiento del VIH; Rango del puntaje: 1-9)	
1	Ensayo aleatorizado	Muy Serio6	No es serio Inconsistencia	Muy Serio7	No es serio Imprecisión	Ninguno	83	76	-	Media
6.81 8	 MUY BAJA	CRITICO	
Conocimiento (Dinoia 2004) (Seguimiento: 4 semanas; evaluado con: Media de conocimiento VIH/SIDA9)	
1	Ensayo aleatorizado	Muy Serio10	No es serio Inconsistencia	Muy Serio11	Serio3	Ninguno	0	-	-	Media
8.18 12	 MUY BAJA	CRITICO	
IC (Intervalo de Confianza)

1 No es claro si se realizó un ocultamiento, ni se hizo el cegamiento y no es claro igualmente la notificación selectiva de los resultados
2 Se observan grandes pérdidas de las personas que completaron el cuestionario de conocimiento, por lo que los resultados pueden estar sesgados
3 No se observa una medida de precisión
4 Se observan grandes pérdidas la muestra total era de 224


5 Media del puntaje de la Intervención (rango 4-15), AL compararlo con el valor del control p=0.004
6 No es clara la secuencia aleatoria, el ocultamiento, el cegamiento y además no refiere el manejo de los datos perdidos
7 No manejo de datos perdidos que podrían modificar los resultados
8 no hay datos suficientes para realizar el cálculo del efecto. Este valor de media es del grupo de intervención del Seguimiento: de 3 meses. t(157) = 3.11, Valor p<0.01
9 Análisis ANCOVA
10 No es claro la secuencia aleatoria, ni el ocultamiento, ni el cegamiento ni el manejo de datos perdidos.
11 Todo fue realizado por análisis de ANCOVA, no muestran los resultados por separado. Esto podría direccionar los resultados
12 Este es el dato del grupo control, no fue posible por la falta de información la realización de la medida de efecto. F (1,200) = 27.86, p < .001

Autor(es): Garzón N
Fecha: 2016-05-08
Pregunta: Formato Multimedia vs Información escrita
Bibliografía: Lo 2010 Lo 2011 Cornoiu 2011 Karunaratne 2010 Koch 2008 Olver 2009

			
Evaluación Cali	
dad			
No de pacie	
ntes		
Efecto		


Calidad	


Importancia	
No de estudios	Diseño del Estudio	Riesgo
de sesgo	
Inconsistencia	Evidencia indirecta	
Imprecisión	Otras consideraciones	
Multimedia	Información escrita	Relativo (95% IC)	
Absoluto			
Conocimiento (lo 2010, lo 2011, Cornoiu 2011) (Seguimiento: 1-2 semanas; evaluado con: Media de escala de conocimiento1)	
3	Ensayo aleatorizado	Muy Serio2	Serio3	Serio4	No es serio Imprecisión	Ninguno	96		107	-	DME 3.16 Más
(1.54ao 4.78
Más)5	 MUY BAJA	CRITICO	
Conocimiento (Karunaratne 2010) (Seguimiento: 1 meses; evaluado con: Nivel de entendimiento)	
1	Ensayo aleatorizado	Serio6	No es serio Inconsistencia	No es serio Evidencia indirecta	Serio7	Ninguno	25/30 (83.3%)	22/30 (73.3%)	0.005 (0 a 0)8	0 menos por
1000 (de 7 más
to 733 más)9	
BAJA	CRITICO	
									0%			-			
Conocimiento (Koch 2008) (Seguimiento: 1 semanas; evaluado con: Media del porcentaje de conocimiento; Rango del puntaje: 0-18)	
1	Ensayo aleatorizado	Serio6	No es serio Inconsistencia	No es serio Evidencia indirecta	Serio7	Ninguno	30		45	-	DM 4.3 Más
(3.92 Menos to
12.52 Más)5,10	
BAJA	CRITICO	
Conocimiento (Olver 2009)11 (Seguimiento: 4 semanas; evaluado con: Proporción de recuerdo de preguntas)	


1	Ensayo aleatorizado	Muy Serio12	No es serio Inconsistencia	No es serio Evidencia indirecta	Serio7	Ninguno	25/47 (53.2%)	31/54 (57.4%)	RR 0.93
(0.65 a
1.32)5,13	40 menos por
1000 (de 201
menos a 184 más)	 MUY BAJA	CRITICO	
								0%		-			
IC (Intervalo de confianza); DME (Diferencia de medias estandarizadas); RR (Riesgo relativo); DM (Diferencias de medias)

1 Son tres escalas diferentes The Self-Care Knowledge Scale (KSCS), Knowledge of burn rehabilitation scale (KBRS) y la tercera un cuestionario que desarrollo el grupo de investigación
2 Los artículos en general presentan riesgo de sesgo no claro en la secuencia aleatoria, ocultamiento y cegamiento. No existe una adecuada manera de manejo de datos perdidos dentro de los estudios con altas perdidas
3 La heterogeneidad se ve reflejada en que las enfermedades a estudio unos son diferentes, una es para personas con estomas, quemados y urología, a pesar que las medias de edades están en rangos parecidos, la medida de conocimiento es enfocada a diferentes preguntas con relación a la enfermedad.
4 No se observa el manejo de datos incompleto dentro de los estudios
5 Cálculo realizado por los autores de la revisión en Review Manager
6 No es claro la secuencia aleatoria no el ocultamiento, así como no presenta ningún tipo de cegamiento
7 No presenta medida de precisión
8 Valor p reportado en el estudio
9 No es posible el cálculo del efecto
10 Del estudio p=0.30. Estos datos del cálculo fueron los del Seguimiento:
11 Recuerdo de la pregunta del tratamiento estándar
12 La aleatorización se realizó mediate número de identificación, no es claro el cegamiento de los participantes y el personal
13 p = 0.69 (Fisher’s exact significance test)

Autor(es): Garzón N
Fecha: 2016-05-12
Pregunta: Formato Cassette + formato escrito vs Formato escrito
Bibliografía: Jenkinson 1988 Raynes 2009

			
Evaluación Calidad			
No de pacient	
es		
Efecto	


Calidad	


Importancia	
No de estudios	Diseño del Estudio	Riesgo de sesgo	
Inconsistencia	Evidencia indirecta	
Imprecisión	Otras consideraciones	Cassette + formato escrito	Formato escrito	Relativo (95% IC)	
Absoluto			
Conocimiento (Jenkinson 1988) (Seguimiento: 12 meses; evaluado con: Media de cambio del puntaje de conocimiento uso del medicamento)	
1	Ensayo aleatorizado	Muy Serio1	No es serio Inconsistencia	No es serio Evidencia	Serio2	Ninguno	41		44	-	Media 13 3	
MUY	CRITICO	


				indirecta							BAJA		
Conocimiento (Raynes 2009) (Seguimiento: 3 meses; evaluado con: media de conocimiento sobre anestesia en el parto (% respuestas correctas))	
1	Ensayo aleatorizado	Serio1	No es serio Inconsistencia	No es serio Evidencia indirecta	Serio4	Ninguno	193	202	-	DM 1.7 Menos
(7.5 Menos a 4.2 Más)5	
BAJA	CRITICO	
Conocimiento (Raynes 2009a) (Seguimiento: 3 meses; evaluado con: media de conocimiento sobre ansiedad (% respuestas correctas); Rango del puntaje: 20-80)	
1	Ensayo aleatorizado	Serio1	No es serio Inconsistencia	No es serio Evidencia indirecta	Serio4	Ninguno	193	202	-	DM 2.9 Menos
(12.4 Menos a 6.6 Más)5	
BAJA	CRITICO	
IC (Intervalo de Confianza); DM (Diferencia de medias)

1 No es claro la secuencia de aleatorización, ocultamiento, no presenta cegamiento de la intervención y no mencionan en adecuado manejo de las perdidas por el Seguimiento: (14%)
2 No se observa medición de la precisión
3 No hay datos suficientes para realizar el cálculo del efecto este valor es solo la media de cambio al año del grupo de intervención. Al compararlo con el grupo control solo se observa el valor p=0.007 (análisis de varianza) en el estudio
4 Presenta IC amplios
5 Obtenida del estudio. Del Seguimiento:

Autor(es): Garzón N
Fecha: 2016-05-12
Pregunta: Formato Multimedia vs Asesoría verbal + impresa
Bibliografía: Krishna 2003

			
Evaluación Calidad			
No de pacien	
tes		
Efecto	


Calidad	


Importancia	
No de estudios	Diseño del Estudio	Riesgo de sesgo	
Inconsistencia	Evidencia indirecta	
Imprecisión	Otras consideraciones	
Multimedia	Asesoría verbal + impresa	Relativo (95% IC)	
Absoluto			
Conocimiento (Krishna 2003) (Seguimiento: 12 meses; evaluado con: Media cambio de conocimiento del 1 a la 3 visita de cuidadores de niños de 0 a 6 años; Rango del puntaje: 0-60)	
1	Ensayo aleatorizado	Serio1	No es serio Inconsistencia	No es serio Evidencia indirecta	Serio2	Ninguno	24	23	-	DM 5.39 Más
(2.12 a 8.66
Más)3	
BAJA	CRITICO	


Conocimiento (Krishna 2003a) (Seguimiento: 12 meses; evaluado con: Media cambio de conocimiento del 1 a la 3 visita de cuidadores de niños de 7 a 17 años; Rango del puntaje: 0-60)	
1	Ensayo aleatorizado	Serio1	No es serio Inconsistencia	No es serio Evidencia indirecta	Serio2	Ninguno	24	23	-	DM 2.24 Más
(0.13 Menos a
4.61 Más)3	
BAJA	CRITICO	
Conocimiento (Krishna 2003b) (Seguimiento: 12 meses; evaluado con: Media cambio de conocimiento del 1 a la 3 visita de niños de 7 a 17 años; Rango del puntaje: 0-60)	
1	Ensayo aleatorizado	Serio1	No es serio Inconsistencia	No es serio Evidencia indirecta	Serio2	Ninguno	25	27	-	DM 5.56 Más
(2.15 a 4.61
Más)3	
BAJA	CRITICO	
IC (Intervalo de Confianza); DM (Diferencia de medias)

1 No es claro la secuencia aleatoria, así como el ocultamiento y el cegamiento de los evaluadores
2 IC amplios, tamaños de muestras muy pequeños
3 Calculo realizado por los autores de la revisión en Review Manager

OTROS DESENLACES
Autor(es): Sanchez N
Fecha: 2016-05-12


			
Evaluación Calidad			
No de pacientes		
Efecto	

Calidad	

Importancia	
No de estudios	Diseño del Estudio	Riesgo de sesgo	Inconsistencia	Evidencia indirecta	Imprecisión	Otras consideraciones	Audiovisual	Other formats	Relativo (95% IC)	Absoluto			
Adherencia (evaluado con: Escala de adherencia Hill-Bone)	
1	Ensayo aleatorizado	Serio1	No es serio Inconsistencia	No es serio Evidencia indirecta	Muy Serio2	Ninguno	453	453	-	Puntajes de Seguimiento: 0.05	
MUY BAJA		
Adherencia (evaluado con: Número de mujeres que acuden a tamizaje)	
1	Ensayo aleatorizado	Serio3	No es serio Inconsistencia	No es serio Evidencia indirecta	Serio4	Ninguno	100	101	-	Diferencia en porcentaje 9.2 Más
(2.6 Menos a 21 Más)	
BAJA		


Adherencia (Seguimiento: 2 semanas; evaluado con: Pressure garment compliance behaviours scale (PGCBS))		
1	Ensayo aleatorizado	Muy Serio5	No es serio Inconsistencia	No es serio Evidencia indirecta	Serio2	Ninguno	32	32	-	Efectividad en cada grupo evaluada con ANCOVAR 0.05 Más	
MUY BAJA		
Ansiedad (evaluado con: Spielberger State-Trait Anxiety Inventory (STAI); Rango del puntaje: 20-80)		
1	Ensayo aleatorizado	Serio1	Serio6	No es serio Evidencia indirecta	Muy Serio2	Ninguno	22	39	-	Puntaje de STAI entre grupos 0.05 Más	
MUY BAJA		
Ansiedad (Seguimiento: 4 meses; evaluado con: Spielberger State-Trait Anxiety Inventory (STAI); Rango del puntaje: 20-80)		
1	Ensayo aleatorizado	Serio1	No es serio Inconsistencia	No es serio Evidencia indirecta	No es serio Imprecisión	Ninguno	48	45	-	Diferencia de medias ponderada 8.24 Menos
(12.04 a 4.44 Menos)	
MODERADO		
Ansiedad (Seguimiento: 2 semanas; evaluado con: Spielberger State-Trait Anxiety Inventory (STAI); Rango del puntaje: 20-80)		
1	Ensayo aleatorizado	Serio1	No es serio Inconsistencia	No es serio Evidencia indirecta	Serio2	Ninguno	25	26	-	Diferencia de medias estandarizadas 0.13 Menos (0.68 Menos a
0.42 Más)	
BAJA		
Ansiedad (Seguimiento: 2 semanas; evaluado con: Spielberger State-Trait Anxiety Inventory (STAI); Rango del puntaje: 20-80)		
1	Ensayo aleatorizado	Serio1	No es serio Inconsistencia	No es serio Evidencia indirecta	No es serio Imprecisión	Ninguno	23	24	-	Diferencia de medias estandarizadas 0.38 Menos (0.94 Menos a
0.18 Más)	
MODERADO		
Ansiedad (Seguimiento: 6 semanas; evaluado con: Hospital Anxiety and Depression Scale: Subescala de ansiedad)		
1	Ensayo aleatorizado	Serio3	No es serio Inconsistencia	No es serio Evidencia indirecta	Serio2	Ninguno	22/132 (16.7%)	20/132 (15.2%)	RR 1.05 (-
0.13 a 0.19)7	8 más por 1000 (de
123 menos a 171 menos)	
BAJA		
								0%		-			
Ansiedad (Seguimiento: 1 semanas; evaluado con: Spielberger State and Trait Anxiety Inventory-S)		
1	Ensayo	Serio1	No es serio	No es serio Evidencia	Serio4	Ninguno	86	87	-	Media 4.6 Menos (7 a			


	aleatorizado		Inconsistencia	indirecta						2 Menos)	BAJA		
Ansiedad (Seguimiento: 2 semanas; evaluado con: Anxiety perception score ; Rango del puntaje: 10-40)		
1	Ensayo aleatorizado	Muy Serio5	No es serio Inconsistencia	No es serio Evidencia indirecta	Serio2	Ninguno	28	30	-	Media 0 Más (1.24 a
0.18 Menos)	
MUY BAJA		
Ansiedad (Seguimiento: 8 meses; evaluado con: Beck Anxiety Inventory (BAI); Rango del puntaje: 0-63)		
1	Ensayo aleatorizado	Muy Serio8	No es serio Inconsistencia	No es serio Evidencia indirecta	Serio4	Ninguno	89	78	-	Diferencia de medias estandarizadas 0.30 Menos (0.74 Menos a
0.15 Más)	
MUY BAJA		
Ansiedad (Seguimiento: 3 meses; evaluado con: State-Trait Anxiety Inventory: versión corta; Rango del puntaje: 20-80)		
1	Ensayo aleatorizado	Serio6,9	No es serio Inconsistencia	No es serio Evidencia indirecta	Serio4	Ninguno	193	202	-	Diferencia de medias
0.00 Más (0.2 Menos a
0.2 Más)	
BAJA		
Ansiedad (Seguimiento: 13 meses; evaluado con: State-Trait Anxiety Inventory for Children; Rango del puntaje: 20-80)		
1	Ensayo aleatorizado	No es serio Riesgo de sesgo	No es serio Inconsistencia	No es serio Evidencia indirecta	Serio2	Ninguno	45	45	-	Media 2 Más (0.15 a
3.85 Más)10	
MODERADO		
Ansiedad (Seguimiento: 16 meses; evaluado con: Spielberger State-Trait Anxiety Inventory (STAI))		
1	Ensayo aleatorizado	Serio1,11	No es serio Inconsistencia	No es serio Evidencia indirecta	Serio2	Ninguno	39	44	-	Cambios en puntaje a lo largo del tiempo
0.004 Más 12	
BAJA		
Cambio en conducta (Seguimiento: 1 semanas; evaluado con: Clinical Trial Decision Preguntanaire)		
1	Ensayo aleatorizado	Serio9	No es serio Inconsistencia	No es serio Evidencia indirecta	Serio2	Ninguno	62/86 (72.1%)	66/87 (75.9%)	RR 0.95
(0.79 a
1.13)	787 menos por 1000
(de 689 más a 886 más)	
BAJA		
								0%		-			
Cambio en conducta (Seguimiento: 3 meses; evaluado con: Escala tipo Likert de 36 ítems sobre autocuidado y estilo de vida)		


1	Ensayo aleatorizado	Serio11,13	No es serio Inconsistencia	No es serio Evidencia indirecta	Serio2	Ninguno	59	53	-	Comparación puntaje autocuidado entre los grupos 0.01 Más	
BAJA	
Cambio en conducta (Seguimiento: 3 meses; evaluado con: Porcentaje de uso de condón en los 3 meses siguientes a la intervención)	
1	Ensayo aleatorizado	Muy Serio5	No es serio Inconsistencia	No es serio Evidencia indirecta	No es serio Imprecisión	Ninguno	21	17	-	Cambio en porcentaje de uso de condón en grupo intervención
0.20 Más (0 a 0.4 Más)14	
BAJA	
Cambio en conducta (Seguimiento: 4 semanas; evaluado con: Reporte de los padres sobre cambios hechos en casa respecto a la exposición de sus hijos a violencia en los medios)	
1	Ensayo aleatorizado	Serio11,13	No es serio Inconsistencia	No es serio Evidencia indirecta	Serio2	Ninguno	50/78 (64.1%)	34/68 (50%)	OR 4.26
(1.95 a
9.27)	310 más por 1000 (de
161 más a 403 más)	
BAJA	
								0%		-		
Cambio en conducta (Seguimiento: 1 año; evaluado con: Uso de condón evaluado como "cupones redimidos")	
1	Ensayo aleatorizado	Serio3	No es serio Inconsistencia	Serio15	No es serio Imprecisión	Ninguno	-16	-	RR 1.15
(1.11 a
1.2)	-	
BAJA	
								0%		-		
Cambio en conducta (Seguimiento: 6 meses; evaluado con: Tiempo hasta fin de enuresis)	
1	Ensayo aleatorizado	Muy Serio1,11	No es serio Inconsistencia	No es serio Evidencia indirecta	No es serio Imprecisión	Ninguno	51	34	-	Diferencias de medias estandarizadas 0.36
Más (0.07 Menos a 0.8 Más)	
BAJA	
Cambio en conducta (Seguimiento: 36 semanas; evaluado con: Dejar de fumar evaluado con niveles de monóxido de carbono exhalado)	
1	Ensayo aleatorizado	Serio3,6	No es serio Inconsistencia	No es serio Evidencia indirecta	Serio2	Ninguno	30	30	-	Porcentaje de mujeres que dejaron de fumar en grupo intervención
19.2 Más	
BAJA	
Cambio en conducta (Seguimiento: 1 año; evaluado con: Uso de condón autoreportado)	
1	Ensayo	Serio1	No es serio	No es serio	Serio2	Ninguno	18/30	18/34	RR 0.88	64 menos por 1000 (de		


	aleatorizado		Inconsistencia	Evidencia indirecta			(60%)	(52.9%)	(0.57 a
1.35)	228 menos a 185 más)	BAJA		
								0%		-			
Cambio en conducta (Seguimiento: años; evaluado con: Satisfaction and Dissatisfaction with Body Parts Scale)		
1	Ensayo aleatorizado	Serio13	No es serio Inconsistencia	No es serio Evidencia indirecta	Serio2	Ninguno	16	38	-	Diferencias de medias estandarizadas 0.13 Más (0.45 Menos a
0.72 Más)	
BAJA		
Cambio en conducta (Seguimiento: 4 semanas; evaluado con: Voluntad de participar en un estudio)		
1	Ensayo aleatorizado	Serio3	No es serio Inconsistencia	No es serio Evidencia indirecta	Serio2	Ninguno	23/42 (54.8%)	17/48 (35.4%)	RR 1.54
(0.96 a
2.47)	191 más por 1000 (de
14 menos a 521 más)	
BAJA		
								0%		-			
Reducción en placa dental (Seguimiento: 12 semanas; evaluado con: Patient Hygiene Performance index)		
1	Ensayo aleatorizado	Serio3,11	No es serio Inconsistencia	No es serio Evidencia indirecta	Serio2	Ninguno	23	28	-	Diferencias de medias estandarizadas 0.24 Menos (0.79 Menos a
0.31 Más)	
BAJA		
Incidencia anual de hipoglicemia severa (Seguimiento: 1 año; evaluado con: Autorreporte)		
1	Ensayo aleatorizado	Serio9	No es serio Inconsistencia	No es serio Evidencia indirecta	Muy Serio4	Ninguno	60/174 (34.5%)	64/181 (35.4%)	RR 0.97
(0.73 a
1.29)	11 menos por 1000 (de
95 menos a 103 más)	
MUY BAJA		
								0%		-			
Incidencia de hipoglicemia severa (Seguimiento: 2 años; evaluado con: Autorreporte)		
1	Ensayo aleatorizado	Serio9	No es serio Inconsistencia	No es serio Evidencia indirecta	Muy Serio4	Ninguno	20/80 (25%)	34/86 (39.5%)	RR 0.63
(0.39 a 1)	146 menos por 1000
(de 241 menos a 0 más)	
MUY BAJA		
								0%		-			
1 Sin cegamiento ni mención de ocultamiento en la selección
2 No se encuentran intervalos de confianza
3 Estudio sin cegamiento en participantes, personal ni evaluadores
4 Intervalos de confianza amplios
5 No se aclara como se realizó el proceso de ocultamiento de asignación y de cegamiento. No mencionan como manejaron datos incompletos, hubo pérdida de Seguimiento: de forma diferencial entre grupos
6 Sin información suficiente sobre desenlaces


7 RR calculado según datos del estudio tomando como desenlace "Preocupación sobre radioterapia en general"
8 Grandes pérdidas en el estudio afectan los resultados; no incluyeron resultados claves sobre la comparación entre grupos
9 Sin ocultamiento, ni cegamiento de evaluadores
10 La diferencia sólo fue significativa (p=0.012), en la escala para estado de ansiedad; no fue significativa en la escala de tendencia (p=0.850) ni en el puntaje total de ansiedad (p=0.160)
11 No se menciona manejo de datos perdidos
12 La diferencia fue significativa entre grupos únicamente en el segundo tiempo de Seguimiento:. No se presenta información sobre desviación estándar
13 Sin cegamiento en evaluadores
14 No hay evaluación entre grupos, sólo cambios dentro de cada grupo
15 Uso de condón evaluado a través de un proxy
16 No se presentan datos sobre cuántos participantes fueron asignados a cada grupo
